# Supplementary material for: Initiation and persistence with dual antiplatelet therapy after acute myocardial infarction: a Danish nationwide population-based cohort study
Source: PubMed Central journal article supplement — BMJ Open. 2016 May 12;6(5):e010880. doi: 10.1136/bmjopen-2015-010880 (PMC4874119; doi:10.1136/bmjopen-2015-010880), 2016-05-12
Supplement: bmjopen-2015-010880supp.pdf [file bmjopen-2015-010880supp.pdf]

**Appendix A: ICD10 and ATC codes used for the identification of conditions and diseases**

| Disease/conditions                     | Codes                                                                                                                                                                                  |
|----------------------------------------|----------------------------------------------------------------------------------------------------------------------------------------------------------------------------------------|
| Heart failure                          | I11.0, I13.0, I13.2, I50                                                                                                                                                               |
| Ischaemic heart disease                | I21-I25                                                                                                                                                                                |
| Previous myocardial infarctions        | I21–I23                                                                                                                                                                                |
| Previous unstable angina pectoris      | I20.0                                                                                                                                                                                  |
| Peripheral arterial disease            | I70, I71, I74                                                                                                                                                                          |
| Stroke total                           | I60–I66 and G45                                                                                                                                                                        |
| Non-ischaemic stroke                   | I60, I61, I62.0, I62                                                                                                                                                                   |
| Ischaemic stroke                       | I63-I66 and G45                                                                                                                                                                        |
| Atrial fibrillation                    | I48                                                                                                                                                                                    |
| Chronic renal dysfunction              | I15.0, I15.1, N03, N04, N05, N11, N18.4, N18.5, Q60, Q61, Z49.1, Z99.2                                                                                                                 |
| Diabetes mellitus                      | E10-E14 and/or ATC A10                                                                                                                                                                 |
| Major bleeding                         | D62.9, I60, I61, I62, I85.0, K22.6, K25.0, K25.2, K25.4, K25.6, K26.0, K26.2, K26.4, K26.6, K27.0, K27.2, K27.4, K27.6, K28.0, K28.2, K28.4, K28.6, K29.0, K62.5, K92.0, K92.1, K92.2. |
| Moderate and severe liver disease      | K71-K719, K721, K730-K768, R18                                                                                                                                                         |
| Bleeding diathesis/coagulation disease | D66, D67, D68, D68.0, D681, D68.2, D68.3, D68.4, D68.8, D68.9, D69, D69.1, D69.3, D69.4, D69.5, D69.6                                                                                  |
| Cancer                                 | C00-C99                                                                                                                                                                                |

**Appendix B: ATC codes used for the identification of drug treatment**

| Drug                    | Code                |
|-------------------------|---------------------|
| ACE-inhibitor           | C09A/B              |
| ARB                     | C09C/D              |
| Beta-blocker            | C07                 |
| Calcium channel blocker | C08                 |
| Insulin                 | A10A                |
| Oral antidiabetic       | A10B                |
| Proton pump inhibitor   | A02B C              |
| Statin                  | C10AA               |
| Warfarin/OAC            | B01AA, B01AE, B01AF |
| NSAIDS                  | M01A                |
| SSRI                    | N06A B              |
